# Supplementary material for: Determining the inherent selectivity for carbon radical hydroxylation versus halogenation with high-spin oxoiron(iv)–halide complexes: a concerted rebound step
Source: Royal Society of Chemistry journal article supplement (doi:10.1039/d2ra01384c), 2022-01-01
Supplement: d2ra01384c1.pdf [file d2ra01384c1.pdf]

## Supporting Information

### Determining the Inherent Selectivity for Carbon Radical Hydroxylation versus Halogenation with High-Spin Oxoiron(IV)–Halide Complexes: A Concerted Rebound Step

Yaping Tao <sup>a,#</sup>, Zixian Li <sup>b,#</sup>, Yiman Zhang <sup>a</sup>, kexi Sun <sup>a</sup>, Zhaojun Liu <sup>a,\*</sup>

<sup>a</sup> College of Physics and Electronic Information & Henan Key Laboratory of Electromagnetic Transformation and Detection, Luoyang Normal University, Luoyang 471934, China

<sup>b</sup> State Key Laboratory of Chemical Resource Engineering, Beijing University of Chemical Technology, Beijing 100029, China

**# These authors contributed equally**

\*Corresponding author.

E-mail addresses: zhaojunliu@gmail.com

**Tests of the functionals:** The unrestricted hybrid density functional method unrestricted Becke, three-parameter, Lee–Yang–Parr (UB3LYP) we have used is commonly accepted and applied for the mononuclear non-heme iron complexes, meanwhile, gives the reliable results in many theoretical investigations<sup>1-5</sup>. To ascertain the choice of UB3LYP, the functional test is carried out. We have used the extra UM06L and UPBE1PBE functionals to optimize the structure of  $[\text{Fe}^{\text{IV}}(\text{O})(\text{TQA})(\text{X})]^+$  (X=Cl and Br). All the functionals tests show that the quintet state is more stable than triplet state. As expected, the UM06L/B1//UM06L/B2 and UPBE1PBE/B1//UPBE1PBE/B2 results are comparable with those obtained from UB3LYP/B1//UB3LYP/B1. Therefore, we selected UB3LYP as the method of choice.

**Table S1. UM06L/B1-, UM06L/B2-, UPBE1PBE/B1- and UPBE1PBE/B2-calculated the relative energies (kcal/mol), mulliken charge and spin densities for the Fe and O atoms and the important bond lengths (Å).**

| X           |             | $\Delta E_{(T-Q)}$ | Mulliken charge |       | Spin densities |      | $r_{Fe-O}$ | $r_{Fe-X}$ |      |
|-------------|-------------|--------------------|-----------------|-------|----------------|------|------------|------------|------|
|             |             |                    | Fe              | O     | Fe             | O    |            |            |      |
| Cl          | UM06L/B1    | T                  | 4.20            | 0.84  | -0.47          | 1.16 | 0.89       | 1.64       | 2.37 |
|             |             | Q                  |                 | 0.85  | -0.46          | 2.94 | 0.71       | 1.64       | 2.34 |
|             | UM06L/B2    | T                  | 7.84            | 0.41  | -0.54          | 1.25 | 0.83       | 1.64       | 2.37 |
|             |             | Q                  |                 | 0.68  | -0.55          | 3.14 | 0.58       | 1.64       | 2.93 |
|             | UPBE1PBE/B1 | T                  | 4.08            | 0.61  | -0.44          | 1.15 | 0.90       | 1.62       | 2.34 |
|             |             | Q                  |                 | 0.72  | -0.43          | 3.03 | 0.68       | 1.61       | 2.37 |
| UPBE1PBE/B2 | T           | 6.71               | 0.04            | -0.51 | 1.24           | 0.83 | 1.62       | 2.34       |      |
|             | Q           |                    | 0.38            | -0.50 | 3.17           | 0.59 | 1.61       | 2.37       |      |
| Br          | UM06L/B1    | T                  | 4.71            | 0.74  | -0.47          | 1.18 | 0.88       | 1.64       | 2.53 |
|             |             | Q                  |                 | 0.75  | -0.47          | 2.93 | 0.73       | 1.64       | 2.50 |
|             | UM06L/B2    | T                  | 7.34            | 0.33  | -0.53          | 1.27 | 0.83       | 1.64       | 2.53 |
|             |             | Q                  |                 | 0.62  | -0.55          | 3.13 | 0.58       | 1.64       | 2.50 |
|             | UPBE1PBE/B1 | T                  | 6.46            | 0.52  | -0.44          | 1.17 | 0.89       | 1.62       | 2.48 |
|             |             | Q                  |                 | 0.61  | -0.43          | 3.06 | 0.67       | 1.62       | 2.50 |

T for triplet; Q for quintet

NOTE: Whether using the UM06L or UPBE1PBE, the quintet state is more stable than triplet state

**Tests of the basis set:** We have used a basis set TZVP, B2 in brief, to calculate single-point energy on the LACVP-optimized geometry. To ascertain the choice of TZVP, we have used higher basis set def2-TZVPP on the calculation of LACVP-optimized geometry of  $[Fe^{IV}(O)(TQA)(X)]^+$  (X=Cl and Br), the basis set test shows that the quintet state is more stable than triplet state.

**Table S2. UB3LYP/def2-TZVPP-calculated the relative energies (kcal/mol), mulliken charge and spin densities for the Fe and O atoms and the important bond lengths (Å).**

| X  |                  | $\Delta E_{(T-Q)}$ | Mulliken charge |      | Spin densities |      | $r_{Fe-O}$ | $r_{Fe-NCME}$ |      |
|----|------------------|--------------------|-----------------|------|----------------|------|------------|---------------|------|
|    |                  |                    | Fe              | O    | Fe             | O    |            |               |      |
| Cl | UB3YP/def2-TZVPP | T                  | 6.78            | 0.49 | -0.50          | 1.24 | 0.82       | 1.64          | 2.50 |
|    |                  | Q                  |                 | 0.78 | -0.50          | 3.10 | 0.63       | 1.63          | 2.51 |
| Br | UB3YP/def2-TZVPP | T                  | 6.97            | 0.48 | -0.49          | 1.24 | 0.82       | 1.64          | 2.34 |
|    |                  | Q                  |                 | 0.75 | -0.49          | 3.10 | 0.63       | 1.63          | 2.34 |

T for triplet; Q for quintet

NOTE: Even if using the higher basis set def2-TZVPP, the quintet state is more stable than triplet state.

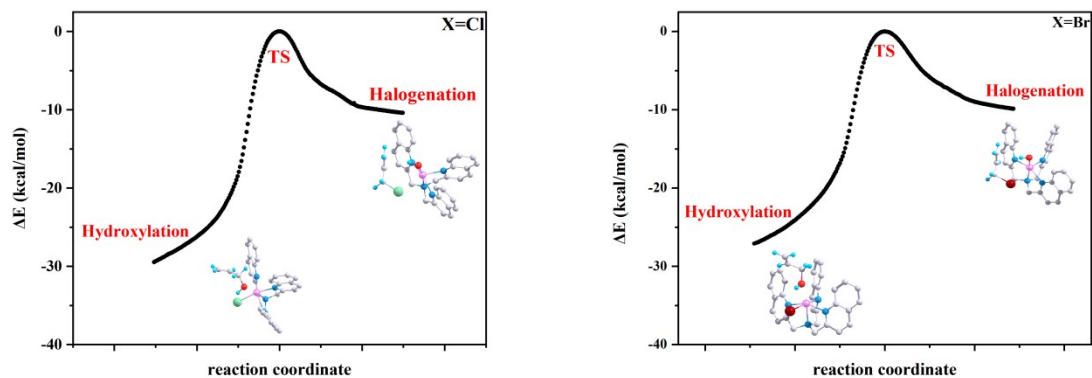

**Fig. S1. The intrinsic reaction coordinate for  $[Fe^{IV}(O)(TQA)(X)]^+$  (X=Cl and Br)**

## Reference

1. J. U. Rohde and L. Que Jr, *Angew. Chem.*, 2005, **117**, 2295-2298.
2. O. Pestovsky, S. Stoian, E. L. Bominaar, X. Shan, E. Münck, L. Que Jr. and A. Bakac, *Angew. Chem.*, 2005, **117**, 7031-7034.
3. A. Decker, J.-U. Rohde, L. Que and E. Solomon, *J. Am. Chem. Soc.*, 2004, **126**, 5378-5379.
4. J. C. Schöneboom, F. Neese and W. Thiel, *J. Am. Chem. Soc.*, 2005, **127**, 5840-5853.
5. D. Quiñonero, K. Morokuma, D. G. Musaev, R. Mas-Ballesté and L. Que, *J. Am. Chem. Soc.*, 2005, **127**, 6548-6549.
